# Supplementary material for: Advanced tree-trimming equipment
Source: MDPI journal article supplement (doi:10.3390/microorganisms9081697), 1990-07-01
Supplement: s1 [file s1]

# Supplementary Materials

## Repurposing of the fasciolicide triclabendazole to treat infections caused by *Staphylococcus* spp. and vancomycin-resistant enterococci

Hongfei Pi <sup>1</sup>, Abiodun D. Ogunniyi <sup>1</sup>, Bhumi Savaliya <sup>1</sup>, Hang Thi Nguyen <sup>1, 2</sup>, Stephen W. Page <sup>3</sup>, Ernest Lacey <sup>4</sup>, Henrietta Venter <sup>5</sup>, Darren J. Trott <sup>1, \*</sup>

<sup>1</sup> Australian Centre for Antimicrobial Resistance Ecology, School of Animal and Veterinary Sciences, Roseworthy Campus, The University of Adelaide, Roseworthy, SA 5371 Australia; hongfei.pi@adelaide.edu.au (H.P.); david.ogunniyi@adelaide.edu.au (A.D.O.); bhumi.savaliya@adelaide.edu.au (B.S.); hang.t.nguyen@adelaide.edu.au (H.T.N.);

<sup>2</sup> Department of Pharmacology, Toxicology, Internal Medicine and Diagnostics, Faculty of Veterinary Medicine, Vietnam National University of Agriculture, Hanoi 100000, Vietnam

<sup>3</sup> Luoda Pharma, Caringbah NSW 2042, Australia; swp@advet.com.au

<sup>4</sup> Microbial Screening Technologies Pty. Ltd, Smithfield, NSW 2164, Australia; elacey@microbialscreening.com

<sup>5</sup> Health and Biomedical Innovation, Clinical and Health Sciences, University of South Australia, Adelaide, SA 5000, Australia; rietie.venter@unisa.edu.au

\* Correspondence: darren.trott@adelaide.edu.au

**Keywords:** multidrug resistance, triclabendazole, polymyxin B, bacterial pathogens, bioluminescence, sepsis

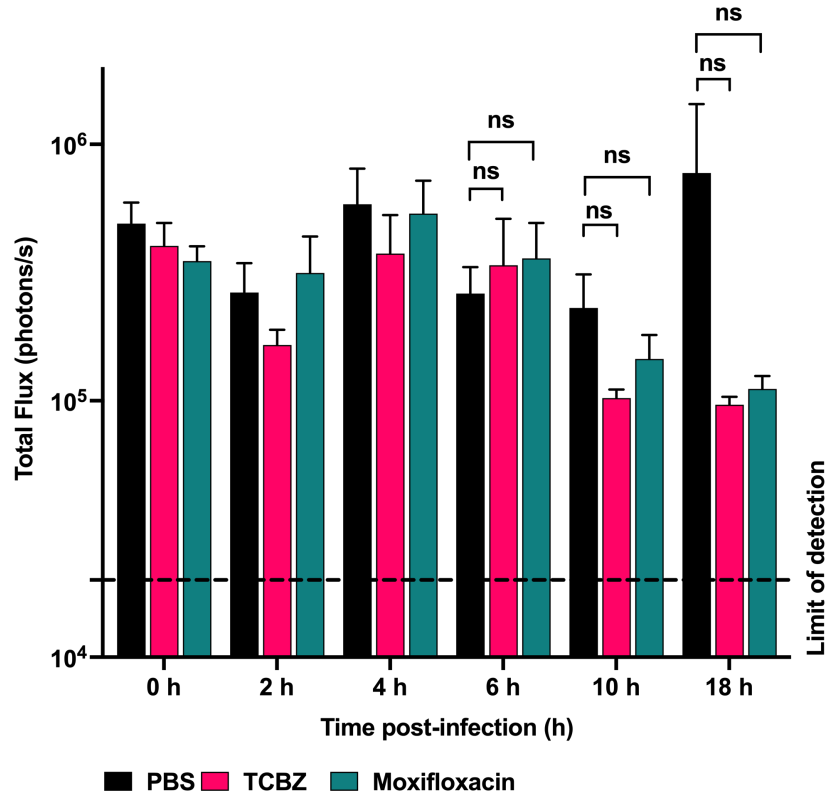

**Figure S1.** Luminescence signal comparison between groups of CD1 mice challenged IP with  $1 \times 10^7$  CFU of *S. aureus* (Xen29) (n=6) (treated at 2, 6, 10 and 18 h post-infection). Mice were subjected to bioluminescence imaging on IVIS Lumina XRMS Series III system. Dashed horizontal line indicates limit of detection ( $2.0 \times 10^4$  photons/s). Data are means ( $\pm$ SEM) photons/s. ns = not significant (Mann-Whitney *U*-test; one-tailed).

**Table S1.** Gram-positive and Gram-negative bacterial collection used in this study (n=138).

| <b>Gram positive (n = 55):</b>                                                        | <b>Gram-negative (n = 83):</b>                |
|---------------------------------------------------------------------------------------|-----------------------------------------------|
| <b>VRE (n = 4):</b>                                                                   | <b><i>E. coli</i> (n = 21):</b>               |
| VRE 16C                                                                               | <i>E. coli</i> ATCC 19763                     |
| VRE 35C                                                                               | <i>E. coli</i> ATCC 25922                     |
| VRE 60FR                                                                              | <i>E. coli</i> ATCC 10763                     |
| VRE 252                                                                               | <i>E. coli</i> clinical isolates n1-n18       |
| <b><i>S. aureus</i> (n = 24):</b>                                                     | <b><i>K. pneumoniae</i> (n = 20):</b>         |
| <i>S. aureus</i> ATCC 29213                                                           | <i>K. pneumoniae</i> ATCC 33495               |
| Bioluminescent Xen29                                                                  | <i>K. pneumoniae</i> ATCC 3452                |
| MSSA 49775                                                                            | <i>K. pneumoniae</i> clinical isolates n1-n18 |
| <b>MRSA (n = 21):</b>                                                                 | <b><i>P. aeruginosa</i> (n = 20):</b>         |
| AUS2                                                                                  | <i>P. aeruginosa</i> PAO1                     |
| AUS3                                                                                  | <i>P. aeruginosa</i> clinical isolates n1-n19 |
| BB PVL                                                                                | <b><i>A. baumannii</i> (n = 18):</b>          |
| Classic MRSA                                                                          | <i>A. baumannii</i> ATCC 19606                |
| Irish 1                                                                               | <i>A. baumannii</i> ATCC 12457                |
| Irsih 2                                                                               | <i>A. baumannii</i> clinical isolates n1-n16  |
| NY/Japan                                                                              | <b><i>N. meningitidis</i> (n = 2):</b>        |
| QLD clone                                                                             | <i>N. meningitidis</i> clinical isolate 423   |
| ST 398                                                                                | <i>N. meningitidis</i> clinical isolate 424   |
| Taiwan                                                                                | <b><i>N. gonorrhoeae</i> (n = 2):</b>         |
| UK 15                                                                                 | <i>N. gonorrhoeae</i> ATCC 16599              |
| UK 15 PVL                                                                             | <i>N. gonorrhoeae</i> ATCC 49226              |
| UK 16                                                                                 |                                               |
| UK 17                                                                                 |                                               |
| USA300                                                                                |                                               |
| WA 1                                                                                  |                                               |
| WA 2                                                                                  |                                               |
| WA 3                                                                                  |                                               |
| WA 84                                                                                 |                                               |
| WSSP                                                                                  |                                               |
| MRSA 610                                                                              |                                               |
| <b><i>S. pneumoniae</i> (n = 2):</b>                                                  |                                               |
| <i>S. pneumoniae</i> A66.1                                                            |                                               |
| <i>S. pneumoniae</i> D39                                                              |                                               |
| <b><i>S. pesudintermedius</i> (n = 3):</b>                                            |                                               |
| SP-1; SP-2; SP-3                                                                      |                                               |
| <b>MRSP (n = 10):</b>                                                                 |                                               |
| MRSP-1; MRSP-2; MRSP-3; MRSP-4;<br>MRSP-5; MRSP-6; MRSP-7; MRSP-8;<br>MRSP-9; MRSP-10 |                                               |
| <b>CoNS (n = 3):</b>                                                                  |                                               |
| CoNS-1; CoNS-1; CoNS-3                                                                |                                               |
| <b><i>Streptococcus spp.</i> (n = 9):</b>                                             |                                               |
| <b><i>S. uberis</i> (n = 3):</b>                                                      |                                               |
| SU-1; SU-2; SU-3                                                                      |                                               |

|                                 |  |
|---------------------------------|--|
| <i>S. agalactiae</i> (n = 3):   |  |
| SA-1; SA-2; SA-3                |  |
| <i>S. dysgalactiae</i> (n = 3): |  |
| SD-1; SD-2; SD-3                |  |

**Table S2.** MIC values of TCBZ against 20 MRSA isolates.

| Isolates                | MIC (µg/mL) of TCBZ | MIC (µg/mL) of daptomycin |
|-------------------------|---------------------|---------------------------|
| AUS 2                   | 4                   | 1                         |
| AUS 3                   | 4                   | 0.5                       |
| BB PVL                  | 4                   | 0.5                       |
| Classic MRSA            | 2                   | 0.5                       |
| Irish 1                 | 2                   | 0.5                       |
| Irish 2                 | 4                   | 0.5                       |
| NY/Japan                | 4                   | 0.5                       |
| QLD clone               | 4                   | 0.25                      |
| ST 398                  | 2                   | 0.5                       |
| Taiwan                  | 2                   | 0.5                       |
| UK 15                   | 2                   | 0.5                       |
| UK 15 PVL               | 2                   | 0.5                       |
| UK 16                   | 4                   | 0.5                       |
| UK 17                   | 2                   | 0.5                       |
| USA 300                 | 2                   | 0.5                       |
| WA 1                    | 2                   | 0.5                       |
| WA 2                    | 2                   | 0.5                       |
| WA 3                    | 2                   | 0.5                       |
| WA 84                   | 2                   | 0.5                       |
| WSPP                    | 2                   | 0.5                       |
| <b>MIC range</b>        | <b>2–4</b>          | <b>0.25–1</b>             |
| <b>MIC<sub>50</sub></b> | <b>2</b>            | <b>0.5</b>                |
| <b>MIC<sub>90</sub></b> | <b>4</b>            | <b>0.5</b>                |

**Table S3.** MIC and MBC values of TCBZ against *S. pseudintermedius* isolates (n = 13).

| Isolates          | MIC (µg/mL) of TCBZ | MBC (µg/mL) of TCBZ |
|-------------------|---------------------|---------------------|
| SP-1              | 4                   | 4                   |
| SP-2              | 4                   | 4                   |
| SP-3              | 4                   | 4                   |
| MRSP-1            | 2                   | 4                   |
| MRSP-2            | 2                   | 4                   |
| MRSP-3            | 4                   | >64                 |
| MRSP-4            | 4                   | 16                  |
| MRSP-5            | 4                   | 4                   |
| MRSP-6            | 4                   | 4                   |
| MRSP-7            | 4                   | 4                   |
| MRSP-8            | 4                   | 4                   |
| MRSP-9            | 4                   | 4                   |
| MRSP-10           | 4                   | 4                   |
| MIC range         | 2-4                 |                     |
| MIC <sub>50</sub> | 4                   |                     |
| MIC <sub>90</sub> | 4                   |                     |
